# Supplementary material for: GASSST: global alignment short sequence search tool
Source: PubMed Central journal article supplement — Bioinformatics. 2010 Aug 24;26(20):2534–40. doi: 10.1093/bioinformatics/btq485 (PMC2951093; doi:10.1093/bioinformatics/btq485), 2010-08-24
Supplement: supp_btq485_supplementary_material.pdf [file supp_btq485_supplementary_material.pdf]

## Supplementary Material

| Program         | Option        | 50bp |    |     | 100bp |    |     | 200bp |     |     | 500bp |    |     |
|-----------------|---------------|------|----|-----|-------|----|-----|-------|-----|-----|-------|----|-----|
|                 |               | 2%   | 5% | 10% | 2%    | 5% | 10% | 2%    | 5%  | 10% | 2%    | 5% | 10% |
| GASSST fast     | -w            | 14   | 14 | 14  | 18    | 18 | 18  | 18    | 18  | 18  | 20    | 20 | 20  |
|                 | -p            | 94   | 90 | 82  | 96    | 91 | 85  | 96    | 92  | 86  | 97    | 93 | 87  |
|                 | -g            | 2    | 3  | 5   | 3     | 5  | 7   | 4     | 7   | 12  | 7     | 14 | 23  |
|                 | -s            | 0    | 0  | 0   | 0     | 0  | 0   | 0     | 0   | 0   | 0     | 0  | 0   |
| GASSST accurate | -w            | 13   | 13 | 13  | 18    | 18 | 18  | 18    | 18  | 18  | 20    | 20 | 20  |
|                 | -p            | 92   | 86 | 78  | 94    | 89 | 81  | 95    | 90  | 83  | 96    | 92 | 86  |
|                 | -g            | 3    | 4  | 6   | 4     | 6  | 9   | 5     | 9   | 13  | 9     | 16 | 26  |
|                 | -s            | 3    | 3  | 3   | 3     | 3  | 3   | 3     | 3   | 3   | 3     | 3  | 3   |
| BWA             | -n            | def  | 5  | 5   | def   | 7  | 7   | def   | def | def | -     | -  | -   |
|                 | -o            | def  | 2  | 2   | def   | 4  | 4   | def   | def | def | -     | -  | -   |
| PASS            | max_seed_hits | 20   | 20 | 20  | 20    | 20 | 20  | 20    | 20  | 20  | -     | -  | -   |
|                 | -pst          | 11   | 9  | 5   | 8     | 4  | 0   | 4     | 0   | 0   | -     | -  | -   |
|                 | -fid          | 94   | 90 | 82  | 96    | 91 | 85  | 96    | 92  | 86  | -     | -  | -   |
|                 | -g            | 2    | 3  | 5   | 3     | 5  | 7   | 4     | 7   | 12  | -     | -  | -   |

Supplemental table S1. "def" means with default program options.

Parameters set for each program and dataset for experiments on simulated data corresponding to Table 4. BWA-SW and SSAHA2 were set with default options. Option -454 was set for SSAHA2 for 100 and 200 bp reads. BFAST was run with its ten recommended indexes, with options -K 8 and -M 1280 for all datasets. PASS was run with seed 11111101111111 and PST table W7M1m0G0X0.pst
